# Supplementary material
Source: PubMed Central journal article supplement (PMC7082767)
Supplement: jamaophthalmol-138-510-s001.pdf [file jamaophthalmol-138-510-s001.pdf]

## Supplementary Online Content

Daniel E, Maguire MG, Grunwald JE, et al; Comparison of Age-Related Macular Degeneration Treatments Trials Research Group. Incidence and progression of nongeographic atrophy in the Comparison of Age-Related Macular Degeneration Treatments Trials (CATT) Clinical Trial. *JAMA Ophthalmol*. Published online March 19, 2020. doi:10.1001/jamaophthalmol.2020.0437

**eFigure 1.** Example of non-geographic atrophy (NGA) evolution in color fundus photographs (CFP), fluorescein angiograms (FA) and OCT images in the area of baseline choroidal neovascularization at baseline, year 1, 2 and 5.

**eFigure 2.** Progression from non-geographic atrophy (NGA) to geographic atrophy (GA) in the Year 1 NGA cohort

**eFigure 3.** Progression from non-geographic atrophy (NGA) to geographic atrophy (GA) in the Year 2 Non-geographic atrophy cohort.

**eFigure 4.** A1, A2 Non-geographic atrophy surrounding a non-fibrotic scar at year 1 developing into geographic atrophy at year 5. B1, B2 Non-geographic atrophy at 1 year with a large fibrotic scar at year 5.

**eTable 1.** Univariate analysis for the baseline risk factors for incident non-geographic atrophy (NGA)

**eTable 2.** Univariate analysis for baseline risk factors for progression from non-geographic atrophy (NGA) to geographic atrophy (GA)

This supplementary material has been provided by the authors to give readers additional information about their work.

**eFigure 1.** Example of non-geographic atrophy (NGA) evolution in color fundus photographs (CFP), fluorescein angiograms (FA) and OCT images in the area of baseline choroidal neovascularization at baseline, year 1, 2 and 5.

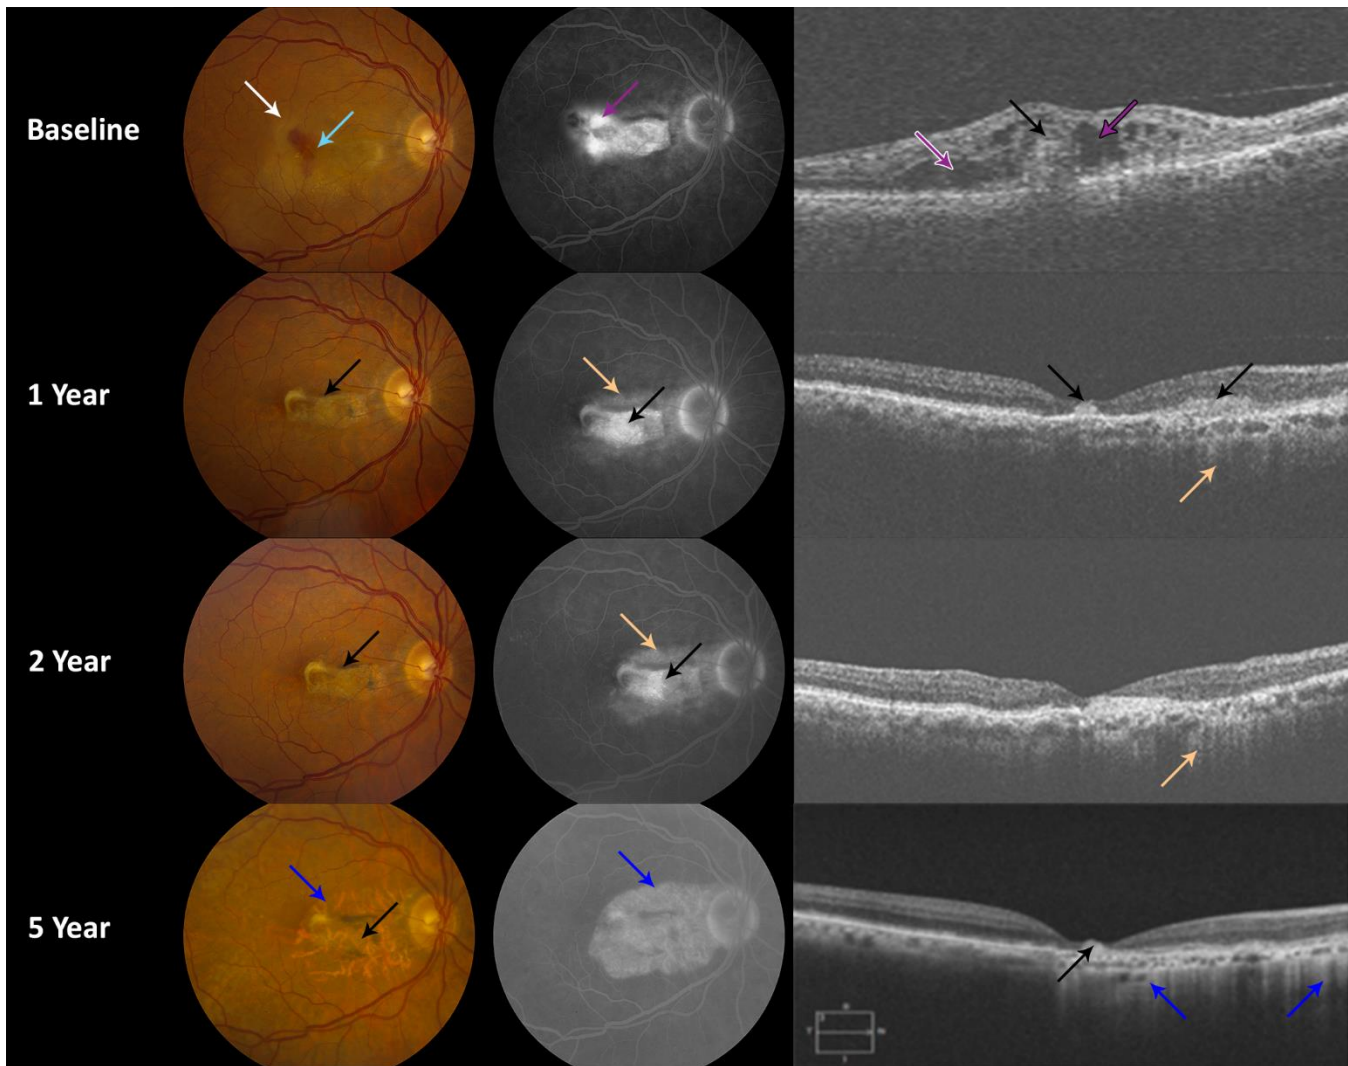

Baseline images show choroidal neovascularization (CNV) (white arrow) with hemorrhage (blue arrow), leakage of dye (purple arrow) and intraretinal fluid (purple arrow with black border), subretinal fluid (purple arrow with white border) and a mass extending into the inner retina (black arrow). At year 1, a rectangular fibrotic scar with no surrounding hypopigmentation or hyperpigmentation (NGA) is observed, but FA shows mild hyperfluorescent areas (yellow arrow) peripheral to the staining fibrotic scar (black arrow) with some choroidal hypertransmission. At year 2, there are no signs of NGA around the scar on color but the peripheral hyperfluorescence has enlarged (yellow arrow) with increased choroidal hypertransmission (yellow arrow). At year 5, there is a large area geographic atrophy (GA) (blue arrow) surrounding a disintegrating fibrotic scar (black arrow) with distinct choroidal hypertransmission. This example suggests that OCT hypertransmission can detect NGA and impending GA earlier than color images.

**eFigure 2. Progression from non-geographic atrophy (NGA) to geographic atrophy (GA) in the Year-1 NGA cohort**

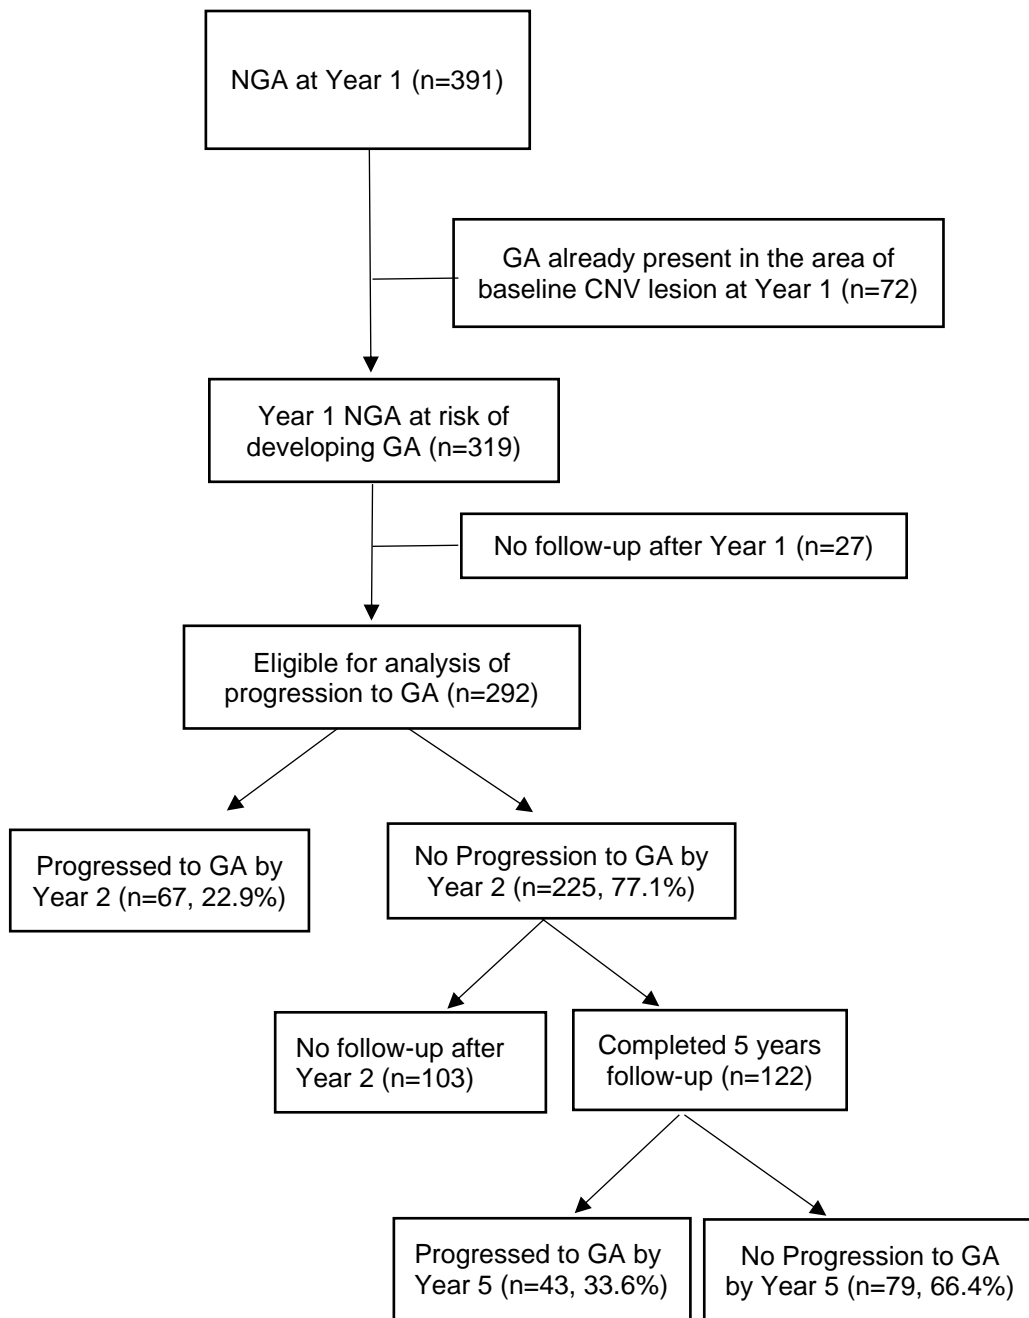

**eFigure 3: Progression from non-geographic atrophy (NGA) to geographic atrophy (GA) in the Year-2 non-geographic atrophy cohort.**

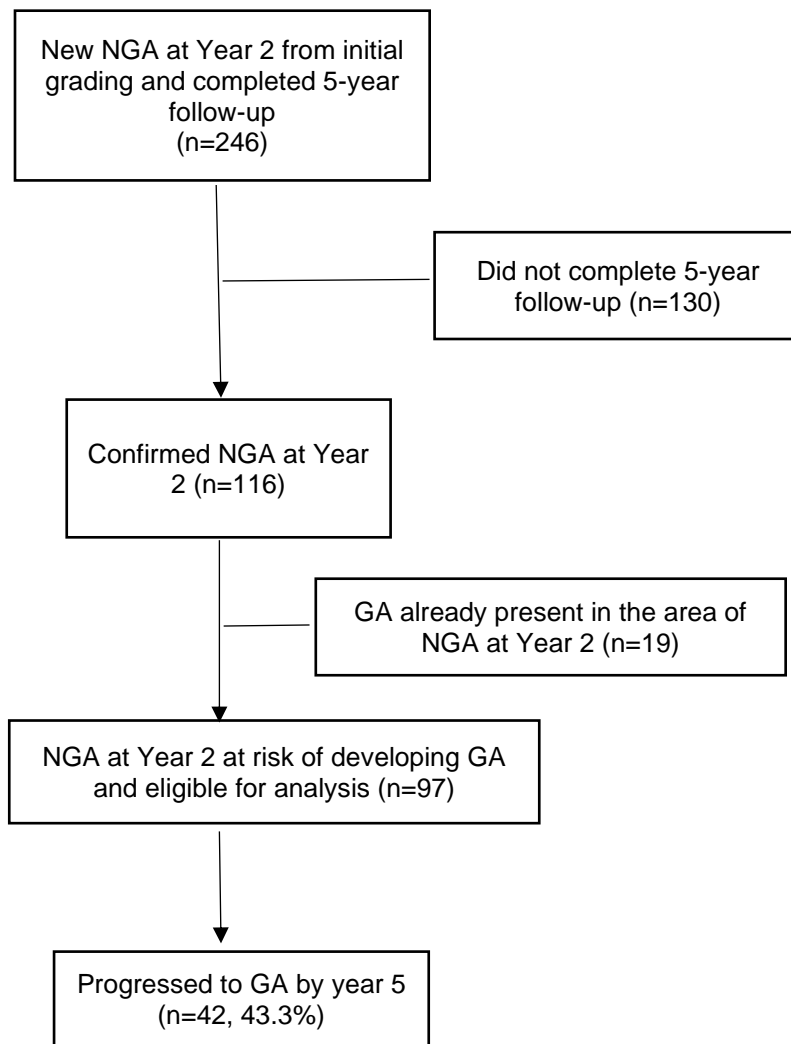

eFigure 4: Supplemental online: A1, A2 Non-geographic atrophy surrounding a non-fibrotic scar at year 1 developing into geographic atrophy at year 5. B1, B2 Non-geographic atrophy at 1 year with a large fibrotic scar at year 5.

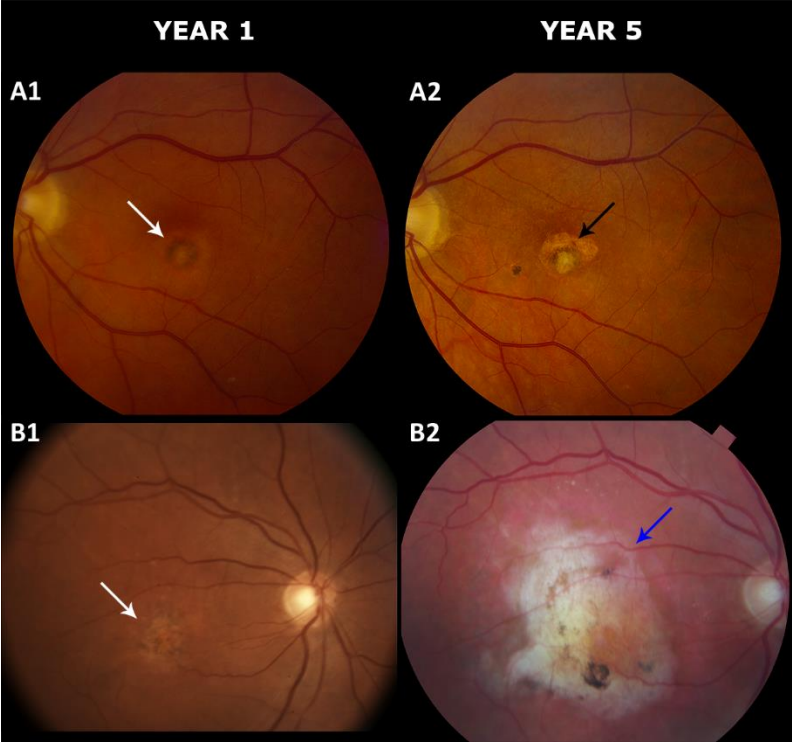

**eTable1. Univariate analysis for the baseline risk factors for incident non-geographic atrophy**

| Baseline demographics        | Number of patients | Non-geographic atrophy by 5 Years n (%) | Risk Ratio (95% CI) | P Value    |
|------------------------------|--------------------|-----------------------------------------|---------------------|------------|
| Age (years)                  |                    |                                         |                     | <b>.03</b> |
| 50-69                        | 134                | 94(70.1%)                               | 1.00                |            |
| 70-79                        | 387                | 268(69.3%)                              | 1.08(0.85,1.37)     |            |
| 80-89                        | 511                | 339(66.3%)                              | 1.12(0.89,1.41)     |            |
| >=90                         | 75                 | 58(77.3%)                               | 1.60(1.15,2.24)     |            |
| Gender                       |                    |                                         |                     | .09        |
| Female                       | 685                | 474(69.2%)                              | 1.00                |            |
| Male                         | 422                | 285(67.5%)                              | 0.99(0.85,1.15)     |            |
| Cigarette Smoking            |                    |                                         |                     | .92        |
| Never                        | 474                | 324(68.4%)                              | 1.00                |            |
| Quit                         | 539                | 374(69.4%)                              | 1.02(0.88,1.19)     |            |
| Current                      | 94                 | 61(64.9%)                               | 0.98(0.74,1.29)     |            |
| Hypertension                 |                    |                                         |                     | .51        |
| No                           | 341                | 243(71.3%)                              | 1.00                |            |
| Yes                          | 766                | 516(67.4%)                              | 0.95(0.81,1.11)     |            |
| Diabetes                     |                    |                                         |                     | .78        |
| No                           | 910                | 626(68.8%)                              | 1.00                |            |
| Yes                          | 197                | 133(67.5%)                              | 0.97(0.81,1.18)     |            |
| Dietary supplement use       |                    |                                         |                     | .94        |
| No                           | 111                | 80(72.1%)                               | 1.00                |            |
| Beta carotene, C, E and Zinc | 702                | 482(68.7%)                              | 0.96(0.75,1.22)     |            |
| Other supplements            | 294                | 197(67.0%)                              | 0.97(0.75,1.27)     |            |
| Hypercholesterolemia         |                    |                                         |                     | .73        |
| No                           | 471                | 318(67.5%)                              | 1.00                |            |
| Yes                          | 636                | 441(69.3%)                              | 1.03(0.89,1.19)     |            |
| Drug group                   |                    |                                         |                     | .93        |
| Bevacizumab                  | 537                | 366(68.2%)                              | 1.00                |            |
| Ranibizumab                  | 570                | 393(68.9%)                              | 1.01(0.87,1.16)     |            |
| Regimen group                |                    |                                         |                     | <b>.01</b> |
| PRN                          | 556                | 369(66.4%)                              | 1.00                |            |
| Switched                     | 268                | 199(74.3%)                              | 1.28 (1.08,1.53)    |            |
| Monthly                      | 283                | 191(67.5%)                              | 1.01 (0.85, 1.21)   |            |

| Baseline ocular characteristics        | Number of study eyes | Non-geographic atrophy by 5 years n (%) | Risk ratio (95% CI) | P-value     |
|----------------------------------------|----------------------|-----------------------------------------|---------------------|-------------|
| Baseline VA Fellow eye                 |                      |                                         |                     | .24         |
| 20/20 or better                        | 333                  | 230(69.1%)                              | 1.00                |             |
| 20/25-20/40                            | 435                  | 290(66.7%)                              | 1.03(0.86,1.22)     |             |
| 20/50 or worse                         | 339                  | 239(70.5%)                              | 1.16(0.96,1.39)     |             |
| Baseline VA Study eye                  |                      |                                         |                     | <b>.007</b> |
| 20/25-40                               | 402                  | 276(68.7%)                              | 1.00                |             |
| 20/50-80                               | 413                  | 276(66.8%)                              | 1.07(0.90,1.26)     |             |
| 20/100-160                             | 221                  | 151(68.3%)                              | 1.10(0.90,1.35)     |             |
| 20/200-320                             | 71                   | 56(78.9%)                               | 1.68(1.25,2.26)     |             |
| Baseline total area of CNV (DA)        |                      |                                         |                     | <b>.03</b>  |
| <=1                                    | 446                  | 304(68.2%)                              | 1.00                |             |
| >1 to <=2                              | 219                  | 142(64.8%)                              | 0.86(0.71,1.06)     |             |
| >2 to <=4                              | 206                  | 151(73.3%)                              | 1.19(0.98,1.45)     |             |
| >4                                     | 104                  | 76(73.1%)                               | 1.18(0.91,1.52)     |             |
| Baseline total area of CNV lesion (DA) |                      |                                         |                     | <b>.03</b>  |
| <=1                                    | 358                  | 251(70.1%)                              | 1.00                |             |
| >1 to <=2                              | 239                  | 150(62.8%)                              | 0.81(0.66,1.00)     |             |
| >2 to <=4                              | 266                  | 194(72.9%)                              | 1.13(0.93,1.36)     |             |
| >4                                     | 202                  | 140(69.3%)                              | 1.03(0.83,1.27)     |             |
| Location of lesion                     |                      |                                         |                     | .89         |
| Not Subfoveal                          | 304                  | 212(69.7%)                              | 1.00                |             |
| Subfoveal                              | 786                  | 539(68.6%)                              | 1.01(0.86,1.19)     |             |
| Lesion type                            |                      |                                         |                     | .48         |
| Predominantly classic                  | 247                  | 171(69.2%)                              | 1.00                |             |
| Minimally classic                      | 184                  | 130(70.7%)                              | 1.02(0.81,1.29)     |             |
| Occult only                            | 653                  | 446(68.3%)                              | 0.92(0.77,1.10)     |             |
| Lesion Composition                     |                      |                                         |                     | .16         |
| CNV only                               | 564                  | 399(70.7%)                              | 1.00                |             |
| CNV and hemorrhage                     | 283                  | 190(67.1%)                              | 1.02(0.86,1.22)     |             |
| CNV and blocked fluorescence           | 76                   | 56(73.7%)                               | 1.13(0.85,1.50)     |             |
| CNV and SPED                           | 47                   | 26(55.3%)                               | 0.65(0.44,0.97)     |             |
| CNV and others                         | 123                  | 82(66.7%)                               | 0.89(0.70,1.13)     |             |
| RAP Lesion                             |                      |                                         |                     | .45         |
| No                                     | 968                  | 662(68.4%)                              | 1.00                |             |

|                                         |      |            |                 |            |
|-----------------------------------------|------|------------|-----------------|------------|
| Yes                                     | 119  | 87(73.1%)  | 1.09(0.87,1.37) |            |
| Blocked fluorescence                    |      |            |                 | .85        |
| No                                      | 936  | 644(68.8%) | 1.00            |            |
| Yes                                     | 159  | 110(69.2%) | 1.02(0.83,1.25) |            |
| SPED (proportion of total lesion)       |      |            |                 | .19        |
| None                                    | 1030 | 717(69.6%) | 1.00            |            |
| <50%                                    | 21   | 15(71.4%)  | 0.82(0.49,1.38) |            |
| >=50%                                   | 40   | 21(52.5%)  | 0.69(0.44,1.06) |            |
| Hemorrhage (associated with the lesion) |      |            |                 | .35        |
| None                                    | 703  | 490(69.7%) | 1.00            |            |
| <=2 DA                                  | 310  | 206(66.5%) | 0.98(0.83,1.15) |            |
| >2 DA                                   | 77   | 56(72.7%)  | 1.21(0.92,1.61) |            |
| Scar                                    |      |            |                 | .19        |
| No                                      | 1050 | 727(69.2%) | 1.00            |            |
| Yes                                     | 43   | 27(62.8%)  | 0.77(0.53,1.14) |            |
| Glaucoma (yes/no)                       |      |            |                 | .84        |
| No                                      | 985  | 674(68.4%) | 1.00            |            |
| Yes                                     | 122  | 85(69.7%)  | 0.98(0.78,1.23) |            |
| CNV at fellow eye                       |      |            |                 | .08        |
| None/questionable                       | 748  | 512(68.4%) | 1.00            |            |
| Present                                 | 328  | 227(69.2%) | 1.15(0.98,1.35) |            |
| GA in fellow eye                        |      |            |                 | .15        |
| None/questionable                       | 966  | 657(68.0%) | 1.00            |            |
| Present                                 | 128  | 94(73.4%)  | 1.18(0.94,1.46) |            |
| Pseudodrusen in study eye               |      |            |                 | .32        |
| No/Questionable                         | 840  | 575(68.5%) | 1.00            |            |
| Yes                                     | 197  | 138(70.1%) | 1.10(0.91,1.33) |            |
| Pseudodrusen in fellow eye              |      |            |                 | <b>.02</b> |
| No/Questionable                         | 753  | 507(67.3%) | 1.00            |            |
| Yes                                     | 254  | 187(73.6%) | 1.22(1.03,1.45) |            |
| Pseudodrusen in either eye              |      |            |                 | .06        |
| No/Questionable                         | 772  | 523(67.7%) | 1.00            |            |
| Yes                                     | 292  | 209(71.6%) | 1.17(1.00,1.38) |            |



| Baseline OCT characteristics         | Number of study eyes | Non-geographic atrophy by 5 years n (%) | Risk ratio (95% CI) | P-value |
|--------------------------------------|----------------------|-----------------------------------------|---------------------|---------|
| Intra-retinal thickness (µm)         |                      |                                         |                     | .07     |
| <120                                 | 113                  | 67(59.3%)                               | 1.00                |         |
| 120 to 212                           | 584                  | 405(69.3%)                              | 1.22(0.94,1.59)     |         |
| >212                                 | 405                  | 285(70.4%)                              | 1.35(1.03,1.77)     |         |
| Sub-retinal thickness (µm)           |                      |                                         |                     | .17     |
| 0                                    | 734                  | 507(69.1%)                              | 1.00                |         |
| >0 to <=25                           | 93                   | 69(74.2%)                               | 1.19(0.92,1.54)     |         |
| >25                                  | 275                  | 181(65.8%)                              | 0.91(0.77,1.08)     |         |
| Sub-RPE thickness (µm)               |                      |                                         |                     | <.001   |
| >0 to <=75                           | 275                  | 194(70.5%)                              | 1.00                |         |
| >75 to <=160                         | 261                  | 193(73.9%)                              | 1.16(0.94,1.42)     |         |
| >160 to <=275                        | 282                  | 204(72.3%)                              | 0.99(0.81,1.21)     |         |
| >275                                 | 284                  | 166(58.5%)                              | 0.72(0.58,0.88)     |         |
| Retinal fluid in the fovea center    |                      |                                         |                     | .004    |
| No Fluid                             | 266                  | 178(66.9%)                              | 1.00                |         |
| Fluid not in fovea center            | 300                  | 193(64.3%)                              | 0.90(0.73,1.10)     |         |
| Fluid in fovea center                | 523                  | 378(72.3%)                              | 1.20(1.00,1.43)     |         |
| Subretinal fluid in the fovea center |                      |                                         |                     | .24     |
| No Fluid                             | 187                  | 117(62.6%)                              | 1.00                |         |
| Fluid not in fovea center            | 523                  | 373(71.3%)                              | 1.19(0.97,1.47)     |         |
| Fluid in fovea center                | 387                  | 261(67.4%)                              | 1.11(0.89,1.38)     |         |
| Sub-RPE fluid in the fovea center    |                      |                                         |                     | .002    |
| No Fluid                             | 483                  | 337(69.8%)                              | 1.00                |         |
| Fluid not in fovea center            | 196                  | 148(75.5%)                              | 1.06(0.87,1.29)     |         |
| Fluid in fovea center                | 343                  | 219(63.8%)                              | 0.76(0.64,0.91)     |         |
| Any fluid                            |                      |                                         |                     | .30     |
| No Fluid                             | 12                   | 5(41.7%)                                | 1.00                |         |
| Fluid not in fovea center            | 189                  | 135(71.4%)                              | 1.99(0.81,4.86)     |         |
| Fluid in fovea center                | 903                  | 618(68.4%)                              | 1.86(0.77,4.50)     |         |
| RPE elevation                        |                      |                                         |                     | .62     |
| No                                   | 145                  | 99(68.3%)                               | 1.00                |         |
| Yes                                  | 946                  | 648(68.5%)                              | 0.95(0.76,1.17)     |         |

|                           |      |            |                 |     |
|---------------------------|------|------------|-----------------|-----|
| SPED                      |      |            |                 | .09 |
| None                      | 1030 | 717(69.6%) | 1.00            |     |
| Not in fovea center       | 27   | 11(40.7%)  | 0.52(0.29,0.94) |     |
| In fovea center           | 34   | 25(73.5%)  | 0.91(0.61,1.36) |     |
| Epiretinal Membrane       |      |            |                 | .15 |
| No                        | 901  | 609(67.6%) | 1.00            |     |
| Yes                       | 156  | 114(73.1%) | 1.16(0.95,1.42) |     |
| Vitreo-macular attachment |      |            |                 | .26 |
| No                        | 908  | 628(69.2%) | 1.00            |     |
| Yes                       | 135  | 86(63.7%)  | 0.88(0.70,1.10) |     |
| SHRM                      |      |            |                 | .52 |
| No                        | 247  | 171(69.2%) | 1.00            |     |
| Yes                       | 845  | 578(68.4%) | 1.06(0.89,1.26) |     |

| Genetic SNP | Number of Patients | Non-geographic atrophy by 5 years n (%) | Risk ratio (95% CI) | P-value     |
|-------------|--------------------|-----------------------------------------|---------------------|-------------|
| CFH         |                    |                                         |                     | .33         |
| TT          | 173                | 117(67.6%)                              | 1.00                |             |
| TC          | 392                | 288(73.5%)                              | 1.08(0.87,1.34)     |             |
| CC          | 270                | 179(66.3%)                              | 0.94(0.74,1.19)     |             |
| ARMS2       |                    |                                         |                     | <b>.001</b> |
| GG          | 266                | 172(64.7%)                              | 1.00                |             |
| GT          | 399                | 280(70.2%)                              | 1.19(0.98,1.44)     |             |
| TT          | 170                | 132(77.6%)                              | 1.53(1.22,1.93)     |             |
| C3          |                    |                                         |                     | .89         |
| CC          | 461                | 320(69.4%)                              | 1.00                |             |
| CG          | 318                | 222(69.8%)                              | 0.97(0.82,1.15)     |             |
| GG          | 56                 | 42(75.0%)                               | 1.04(0.75,1.44)     |             |
| HTRA1       |                    |                                         |                     | <b>.002</b> |
| GG          | 274                | 175(63.9%)                              | 1.00                |             |
| AG          | 399                | 284(71.2%)                              | 1.23(1.01,1.48)     |             |
| AA          | 162                | 125(77.2%)                              | 1.51(1.20,1.91)     |             |
| LIPC        |                    |                                         |                     | .85         |
| TT          | 48                 | 36(75.0%)                               | 1.00                |             |
| CT          | 345                | 246(71.3%)                              | 0.96(0.67,1.36)     |             |

|         |     |            |                 |     |
|---------|-----|------------|-----------------|-----|
| CC      | 441 | 302(68.5%) | 0.92(0.65,1.31) |     |
| CFB     |     |            |                 | .52 |
| TT      | 786 | 548(69.7%) | 1.00            |     |
| AT      | 47  | 34(72.3%)  | 1.19(0.83,1.69) |     |
| AA      | 2   | 2(100.0%)  | 1.61(0.39,6.67) |     |
| C2      |     |            |                 |     |
| TT      | 4   | 3(75.0%)   | 1.00            | .91 |
| GT      | 149 | 105(70.5%) | 0.92(0.29,2.92) |     |
| GG      | 680 | 474(69.7%) | 0.88(0.28,2.77) |     |
| CFH162v |     |            |                 |     |
| TT      | 525 | 366(69.7%) | 1.00            | .98 |
| GT      | 193 | 129(66.8%) | 0.98(0.80,1.20) |     |
| GG      | 14  | 10(71.4%)  | 0.99(0.52,1.87) |     |
| TLR3    |     |            |                 | .81 |
| CC      | 76  | 51(67.1%)  | 1.00            |     |
| CT      | 341 | 236(69.2%) | 1.00(0.73,1.35) |     |
| CC      | 418 | 297(71.1%) | 1.05(0.78,1.42) |     |

PRN=pro re nata, VA=Visual Acuity, CNV=choroidal neovascularization, DA = Disc Areas, SPED = Serous pigment epithelial detachment, RAP = Retinal angiomatous proliferens, RPE = Retinal pigment epithelium, SHRM = Sub-retinal hyper-reflective material, GA = Geographic Area, SNP = Single nucleotide polymorphisms

**eTable 2. Univariate analysis for baseline risk factors for progression from Non-geographic atrophy NGA to Geographic atrophy (GA)**

| Baseline Features            | Number of study eyes with non-geographic atrophy | Progression to geographic atrophy n (%) | Risk ratio (95% CI) | P-value     |
|------------------------------|--------------------------------------------------|-----------------------------------------|---------------------|-------------|
| Age (years)                  |                                                  |                                         |                     | <b>.009</b> |
| 50-69                        | 50                                               | 14(28.0%)                               | 1.00                |             |
| 70-79                        | 148                                              | 60(40.5%)                               | 1.59(0.89,2.85)     |             |
| 80-89                        | 166                                              | 68(41.2%)                               | 2.13(1.20,3.80)     |             |
| >=90                         | 25                                               | 10(40.0%)                               | 3.47(1.52,7.91)     |             |
| Gender                       |                                                  |                                         |                     | <b>.02</b>  |
| Female                       | 254                                              | 109(42.9%)                              | 1.00                |             |
| Male                         | 135                                              | 43(32.1%)                               | 0.66(0.46,0.94)     |             |
| Cigarette Smoking            |                                                  |                                         |                     | <b>.87</b>  |
| Never                        | 164                                              | 65(39.6%)                               | 1.00                |             |
| Quit                         | 192                                              | 74(38.7%)                               | 1.02(0.73,1.42)     |             |
| Current                      | 33                                               | 13(39.4%)                               | 0.87(0.48,1.58)     |             |
| Hypertension                 |                                                  |                                         |                     | <b>.83</b>  |
| No                           | 132                                              | 54(41.2%)                               | 1.00                |             |
| Yes                          | 257                                              | 98(38.1%)                               | 0.96(0.69,1.35)     |             |
| Diabetes                     |                                                  |                                         |                     | <b>.73</b>  |
| No                           | 321                                              | 126(39.3%)                              | 1.00                |             |
| Yes                          | 68                                               | 26(38.8%)                               | 1.08(0.70,1.65)     |             |
| Dietary supplement use       |                                                  |                                         |                     | <b>.64</b>  |
| No                           | 41                                               | 15(37.5%)                               | 1.00                |             |
| Beta carotene, C, E and Zinc | 252                                              | 103(40.9%)                              | 1.17(0.68,2.02)     |             |
| Other supplements            | 96                                               | 34(35.4%)                               | 0.99(0.54,1.82)     |             |
| Drug group                   |                                                  |                                         |                     | <b>.21</b>  |
| Bevacizumab                  | 198                                              | 73(37.1%)                               | 1.00                |             |
| Ranibizumab                  | 191                                              | 79(41.4%)                               | 1.23(0.89,1.69)     |             |
| Regimen group                |                                                  |                                         |                     | <b>.12</b>  |
| Pro re nata (PRN)            | 187                                              | 67(36.0%)                               | 1.00                |             |
| Switched                     | 106                                              | 38(35.8%)                               | 1.00(0.67, 1.49)    |             |
| Monthly                      | 96                                               | 47(49.0%)                               | 1.44(0.99, 2.10)    |             |

|                                         |     |            |                 |             |
|-----------------------------------------|-----|------------|-----------------|-------------|
| Baseline VA fellow eye                  |     |            |                 | <b>.005</b> |
| 20/20 or better                         | 121 | 36(30.0%)  | 1.00            |             |
| 20/25-20/40                             | 154 | 68(44.2%)  | 1.76(1.17,2.64) |             |
| 20/50 or worse                          | 114 | 48(42.1%)  | 1.97(1.28,3.06) |             |
| Baseline VA Study eye                   |     |            |                 | <b>.001</b> |
| 20/25-40                                | 156 | 54(34.8%)  | 1.00            |             |
| 20/50-80                                | 132 | 49(37.1%)  | 1.23(0.84,1.82) |             |
| 20/100-160                              | 73  | 32(43.8%)  | 1.93(1.24,3.01) |             |
| 20/200-320                              | 28  | 17(60.7%)  | 2.66(1.53,4.62) |             |
| Baseline total area of CNV (DA)         |     |            |                 | .29         |
| <=1                                     | 166 | 60(36.4%)  | 1.00            |             |
| >1 to <=2                               | 64  | 22(34.4%)  | 0.83(0.51,1.35) |             |
| >2 to <=4                               | 79  | 31(39.2%)  | 1.14(0.74,1.76) |             |
| >4                                      | 40  | 19(47.5%)  | 1.48(0.88,2.48) |             |
| Baseline total area of CNV lesion (D A) |     |            |                 | .13         |
| <=1                                     | 138 | 55(39.9%)  | 1.00            |             |
| >1 to <=2                               | 69  | 19(27.9%)  | 0.60(0.36,1.02) |             |
| >2 to <=4                               | 100 | 40(40.0%)  | 1.01(0.67,1.52) |             |
| >4                                      | 72  | 33(45.8%)  | 1.18(0.76,1.82) |             |
| Location of lesion                      |     |            |                 | .93         |
| Not Subfoveal                           | 98  | 36(37.1%)  | 1.00            |             |
| Subfoveal                               | 288 | 114(39.6%) | 0.98(0.67,1.43) |             |
| Lesion type                             |     |            |                 | .45         |
| Predominantly classic                   | 87  | 35(40.7%)  | 1.00            |             |
| Minimally classic                       | 66  | 24(36.4%)  | 0.72(0.42,1.21) |             |
| Occult only                             | 230 | 91(39.6%)  | 0.85(0.57,1.26) |             |
| RAP Lesion                              |     |            |                 | <b>.02</b>  |
| No                                      | 338 | 126(37.4%) | 1.00            |             |
| Yes                                     | 47  | 23(48.9%)  | 1.70(1.09,2.67) |             |
| Blocked fluorescence                    |     |            |                 | .37         |
| No                                      | 332 | 130(39.3%) | 1.00            |             |
| Yes                                     | 55  | 20(36.4%)  | 0.81(0.50,1.29) |             |
| Hemorrhage (associated with the lesion) |     |            |                 | .50         |
| None                                    | 254 | 100(39.4%) | 1.00            |             |
| <=2 DA                                  | 106 | 41(39.0%)  | 0.86(0.60,1.24) |             |

|                                                                 |     |            |                 |             |
|-----------------------------------------------------------------|-----|------------|-----------------|-------------|
| >2 DA                                                           | 27  | 9(33.3%)   | 0.71(0.36,1.41) |             |
| CNV in fellow eye                                               |     |            |                 | .91         |
| None/questionable                                               | 258 | 100(38.9%) | 1.00            |             |
| Present                                                         | 119 | 46(38.7%)  | 1.02(0.72,1.45) |             |
| GA in fellow eye                                                |     |            |                 | <b>.006</b> |
| None/questionable                                               | 342 | 127(37.2%) | 1.00            |             |
| Present                                                         | 43  | 23(53.5%)  | 1.89(1.20,2.95) |             |
| Pseudodrusen in study eye                                       |     |            |                 | .37         |
| No/Questionable                                                 | 292 | 115(39.4%) | 1.00            |             |
| Yes                                                             | 80  | 33(41.3%)  | 1.19(0.81,1.76) |             |
| Pseudodrusen in fellow eye                                      |     |            |                 | <b>.001</b> |
| No/Questionable                                                 | 260 | 88(34.0%)  | 1.00            |             |
| Yes                                                             | 101 | 50(49.5%)  | 1.84(1.29,2.61) |             |
| Pseudodrusen in either eye                                      |     |            |                 | <b>.007</b> |
| No/Questionable                                                 | 264 | 95(36.1%)  | 1.00            |             |
| Yes                                                             | 115 | 54(47.0%)  | 1.59(1.13,2.22) |             |
| GA outside non-GA area at the visit of first non-GA observation |     |            |                 | <b>.02</b>  |
| Absent                                                          | 372 | 143(38.5%) | 1.00            |             |
| Present                                                         | 17  | 9(52.9%)   | 2.19(1.11,4.31) |             |

| <b>OCT characteristics</b>                     |     |            |                 |             |
|------------------------------------------------|-----|------------|-----------------|-------------|
| Intra-retinal thickness (µm)                   |     |            |                 | .24         |
| <120                                           | 35  | 11(31.4%)  | 1.00            |             |
| 120 to 212                                     | 220 | 82(37.3%)  | 1.33(0.71,2.51) |             |
| >212                                           | 134 | 59(44.4%)  | 1.64(0.86,3.12) |             |
| Sub-retinal thickness (µm)                     |     |            |                 | .11         |
| 0                                              | 252 | 104(41.3%) | 1.00            |             |
| >0 to <=25                                     | 33  | 13(39.4%)  | 0.86(0.48,1.54) |             |
| >25                                            | 104 | 35(34.0%)  | 0.66(0.45,0.98) |             |
| Sub-RPE thickness (µm)                         |     |            |                 | .23         |
| >0 to <=75                                     | 99  | 36(36.7%)  | 1.00            |             |
| >75 to <=160                                   | 105 | 48(45.7%)  | 1.33(0.86,2.06) |             |
| >160 to <=275                                  | 99  | 41(41.4%)  | 1.28(0.82,2.01) |             |
| >275                                           | 86  | 27(31.4%)  | 0.87(0.53,1.43) |             |
| Intraretinal fluid in the fovea center(yes/no) |     |            |                 | <b>.005</b> |
| No Fluid                                       | 102 | 28(27.5%)  | 1.00            |             |

|                                              |     |            |                  |                 |
|----------------------------------------------|-----|------------|------------------|-----------------|
| Fluid not in fovea center                    | 96  | 41(42.7%)  | 1.98(1.22,3.21)  |                 |
| Fluid in fovea center                        | 185 | 81(44.0%)  | 1.99(1.29,3.07)  |                 |
| Subretinal fluid in the fovea center(yes/no) |     |            |                  | <b>&lt;.001</b> |
| No Fluid                                     | 61  | 36(59.0%)  | 1.00             |                 |
| Fluid not in fovea center                    | 180 | 67(37.2%)  | 0.49(0.32,0.73)  |                 |
| Fluid in fovea center                        | 145 | 48(33.3%)  | 0.38(0.25,0.59)  |                 |
| Sub-RPE fluid in the fovea center(yes/no)    |     |            |                  | .90             |
| No Fluid                                     | 178 | 70(39.5%)  | 1.00             |                 |
| Fluid not in fovea center                    | 76  | 32(42.1%)  | 1.10(0.72,1.68)  |                 |
| Fluid in fovea center                        | 106 | 40(37.7%)  | 1.00(0.68,1.48)  |                 |
| Any fluid                                    |     |            |                  | .80             |
| No Fluid                                     | 4   | 1(25.0%)   | 1.00             |                 |
| Fluid not in fovea center                    | 67  | 25(37.3%)  | 1.40(0.19,10.33) |                 |
| Fluid in fovea center                        | 318 | 126(39.7%) | 1.56(0.22,11.21) |                 |
| RPE elevation                                |     |            |                  | .49             |
| No                                           | 59  | 21(36.2%)  | 1.00             |                 |
| Yes                                          | 321 | 128(39.9%) | 1.18(0.74,1.87)  |                 |
| SPED                                         |     |            |                  | .33             |
| None                                         | 368 | 145(39.5%) | 1.00             |                 |
| Not in fovea center                          | 7   | 1(14.3%)   | 0.30(0.04,2.17)  |                 |
| In fovea center                              | 12  | 4(33.3%)   | 0.63(0.23,1.70)  |                 |
| Epiretinal Membrane                          |     |            |                  | .19             |
| No                                           | 310 | 120(38.7%) | 1.00             |                 |
| Yes                                          | 59  | 26(44.8%)  | 1.33(0.87,2.04)  |                 |
| Vitreo-macular attachment                    |     |            |                  | .08             |
| No                                           | 314 | 130(41.5%) | 1.00             |                 |
| Yes                                          | 54  | 15(27.8%)  | 0.62(0.36,1.06)  |                 |
| SHRM                                         |     |            |                  | .99             |
| No                                           | 87  | 37(43.0%)  | 1.00             |                 |
| Yes                                          | 298 | 113(37.9%) | 1.00(0.69,1.45)  |                 |

| Genotype |     |            |                 |     |
|----------|-----|------------|-----------------|-----|
| CFH      |     |            |                 | .86 |
| TT       | 60  | 23(38.3%)  | 1.00            |     |
| TC       | 154 | 61(39.9%)  | 0.95(0.59,1.54) |     |
| CC       | 98  | 36(36.7%)  | 0.87(0.51,1.47) |     |
| ARMS2    |     |            |                 | .20 |
| GG       | 90  | 33(37.1%)  | 1.00            |     |
| GT       | 154 | 54(35.1%)  | 0.93(0.60,1.44) |     |
| TT       | 68  | 33(48.5%)  | 1.37(0.84,2.23) |     |
| C3       |     |            |                 | .49 |
| CC       | 170 | 64(37.9%)  | 1.00            |     |
| CG       | 120 | 48(40.0%)  | 1.24(0.85,1.80) |     |
| GG       | 22  | 8(36.4%)   | 0.94(0.45,1.97) |     |
| HTRA1    |     |            |                 | .14 |
| GG       | 90  | 32(36.0%)  | 1.00            |     |
| AG       | 158 | 56(35.4%)  | 1.03(0.66,1.59) |     |
| AA       | 64  | 32(50.0%)  | 1.53(0.94,2.51) |     |
| LIPC     |     |            |                 | .82 |
| TT       | 15  | 4(26.7%)   | 1.00            |     |
| CT       | 134 | 51(38.1%)  | 1.38(0.50,3.84) |     |
| CC       | 163 | 65(40.1%)  | 1.34(0.49,3.70) |     |
| CFB      |     |            |                 | .84 |
| TT       | 293 | 114(39.0%) | 1.00            |     |
| AT       | 17  | 6(35.3%)   | 1.28(0.56,2.94) |     |
| AA       | 2   | 0(0.0%)    | 0.00(0.00)      |     |
| CFH162v  |     |            |                 | .31 |
| TT       | 193 | 66(34.4%)  | 1.00            |     |
| GT       | 78  | 35(44.9%)  | 1.38(0.91,2.08) |     |
| GG       | 6   | 3(50.0%)   | 1.22(0.38,3.91) |     |
| TLR3     |     |            |                 | .75 |
| CC       | 27  | 10(37.0%)  | 1.00            |     |
| CT       | 127 | 47(37.0%)  | 1.11(0.56,2.21) |     |
| CC       | 158 | 63(40.1%)  | 1.24(0.64,2.43) |     |



PRN=pro re nata, VA=Visual Acuity, CNV=choroidal neovascularization, DA = Disc Areas, SPED = Serous pigment epithelial detachment, RAP = Retinal angiomatous proliferens, RPE = Retinal pigment epithelium, SHRM = Sub-retinal hyper-reflective material, GA = Geographic Area, SNP = Single nucleotide polymorphisms
